# Supplementary material for: A cooperation molecular recognition study: syntheses and analysis of supramolecular assemblies of tetrafluoroterephthalic acid with some aza compounds
Source: Royal Society of Chemistry journal article supplement (doi:10.1039/c3ce26865a), 2013-01-01
Supplement: c3ce26865a.pdf [file c3ce26865a.pdf]

## Supporting information for this article:

### TGA and DSC curves

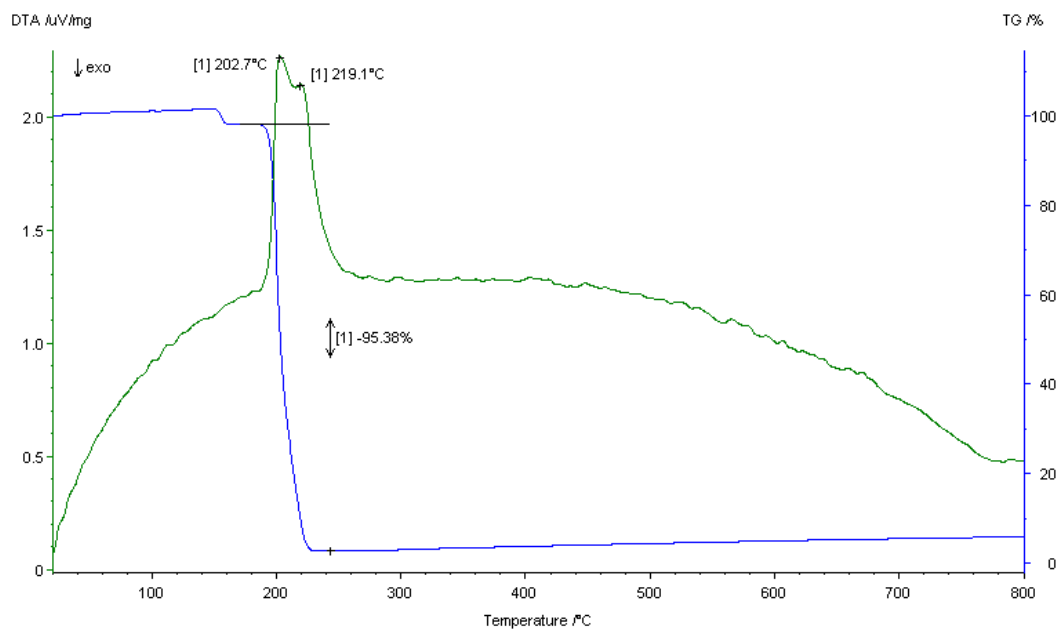

The TGA and DSC curves of **1**

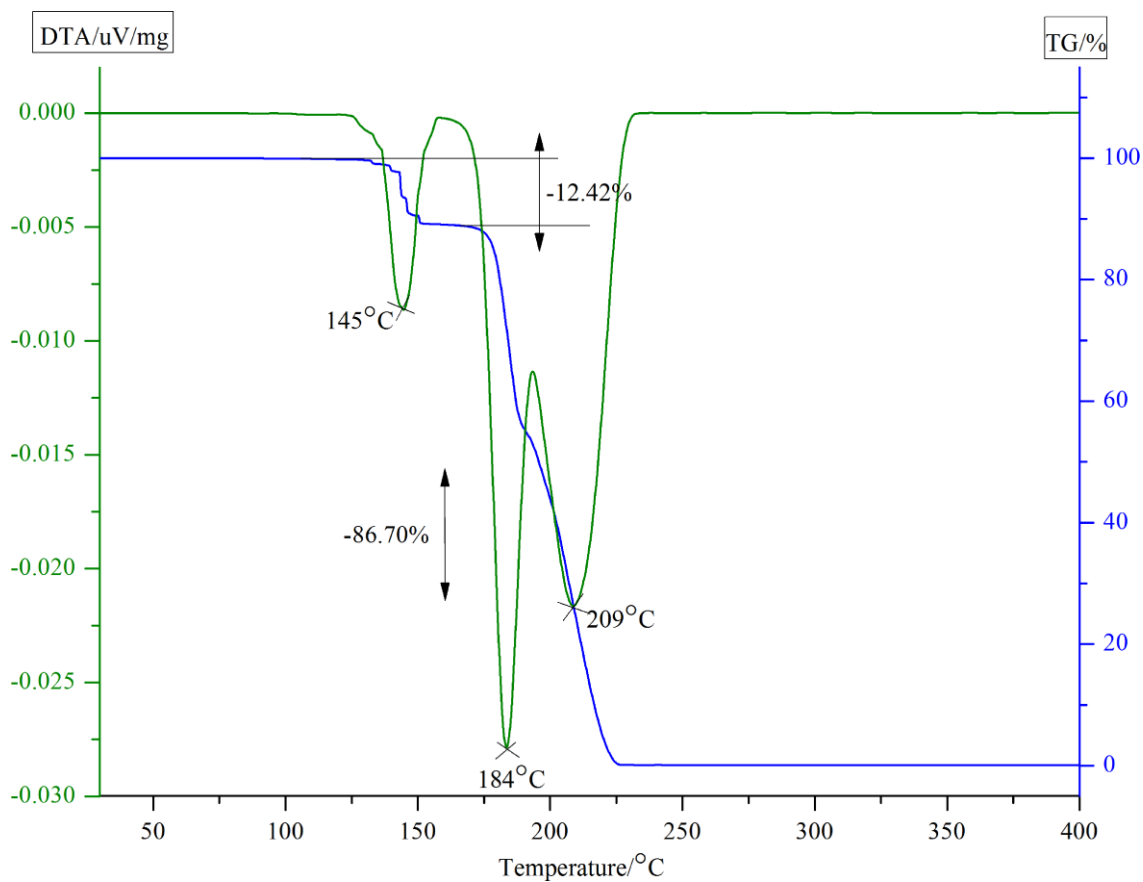

The TGA and DSC curves of **2**

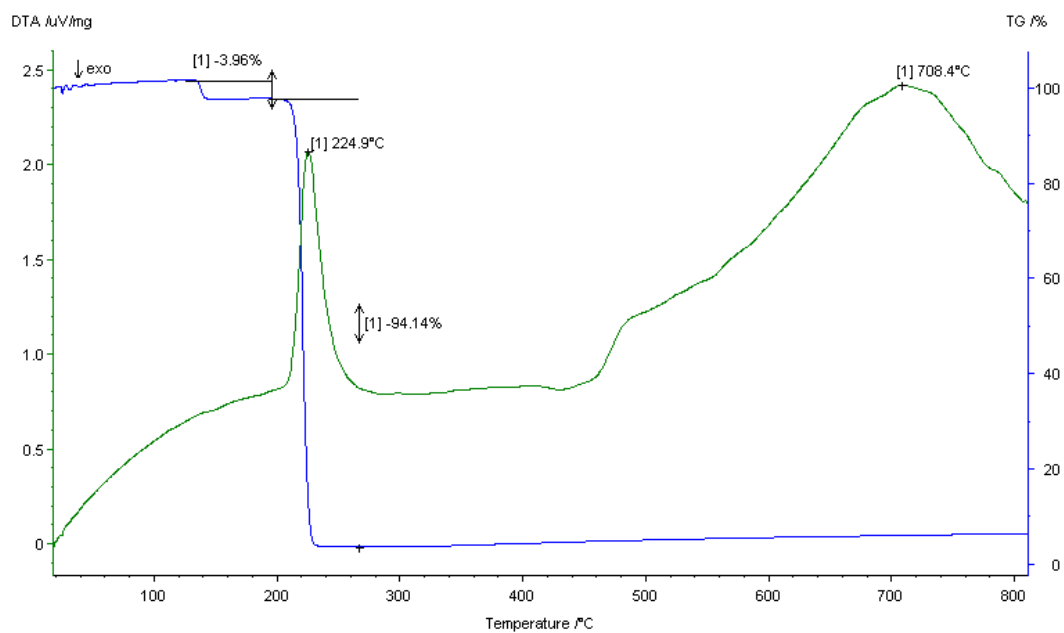

The TGA and DSC curves of **3**

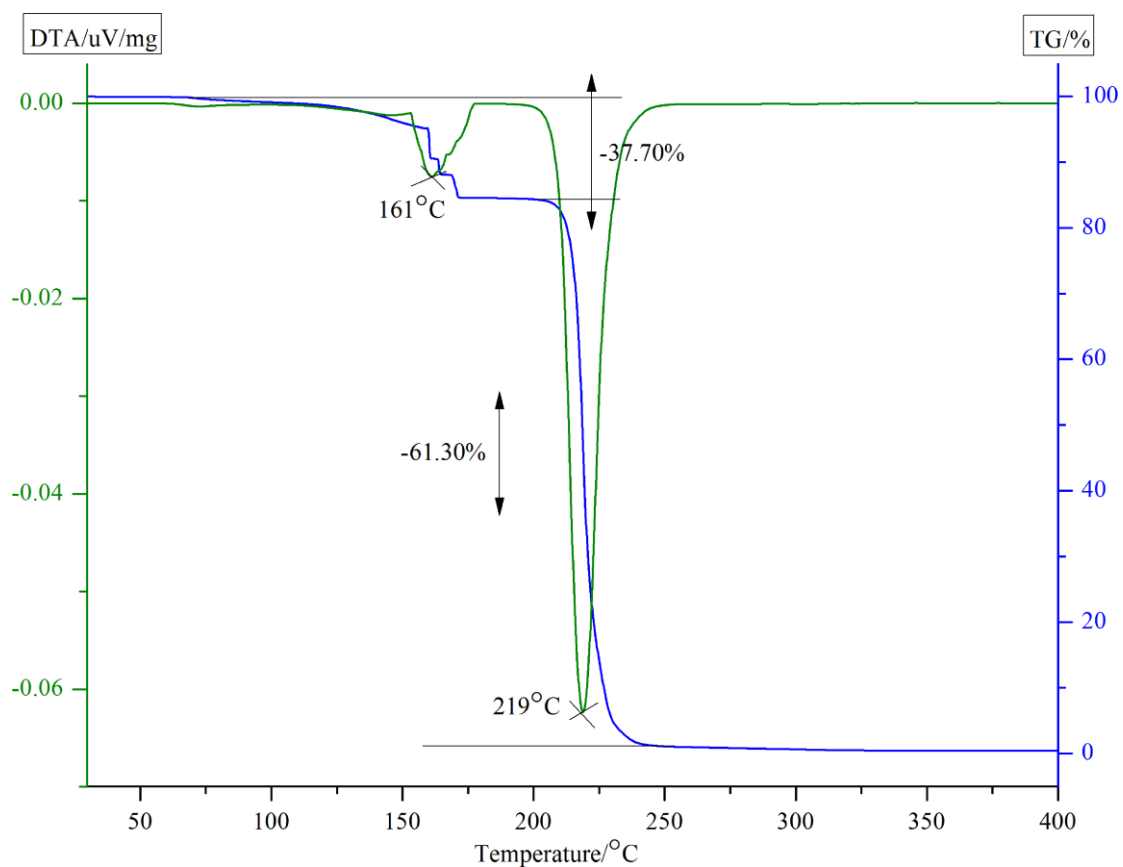

The TGA and DSC curves of **4**

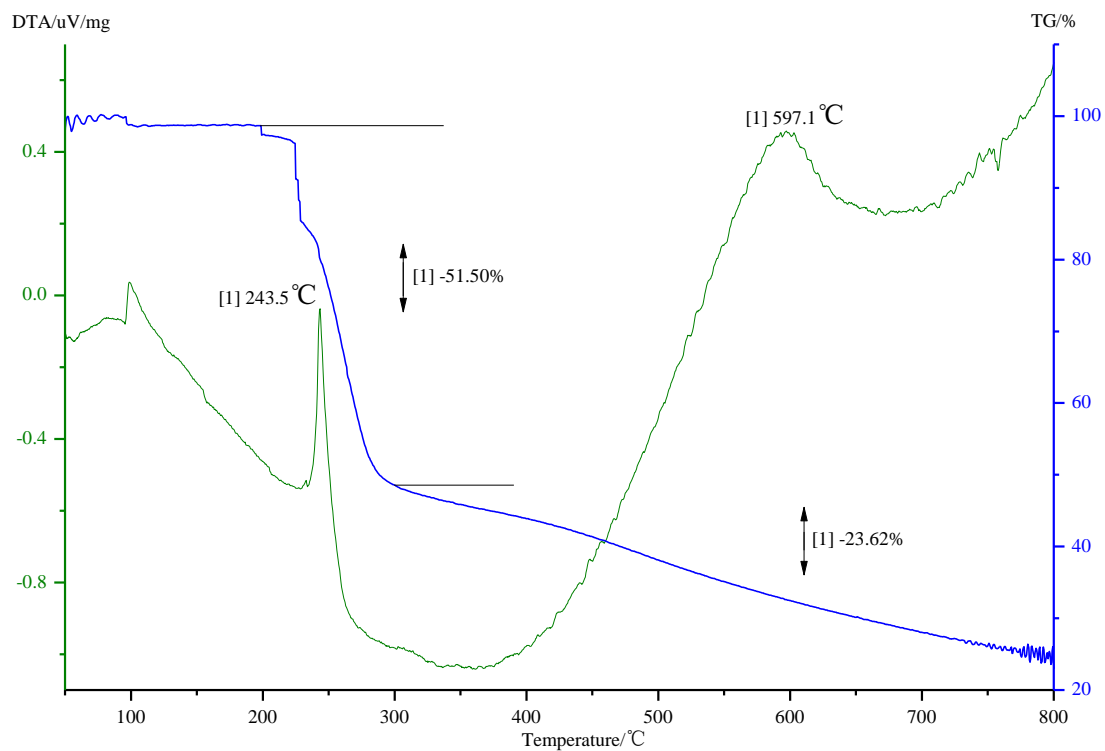

The TGA and DSC curves of **5**

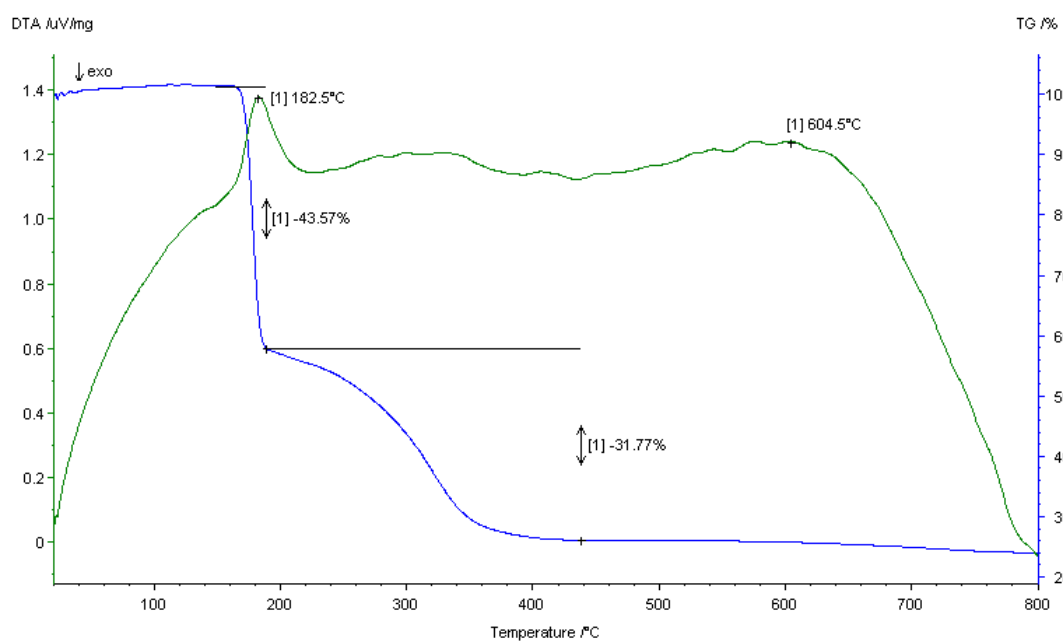

The TGA and DSC curves of **6**

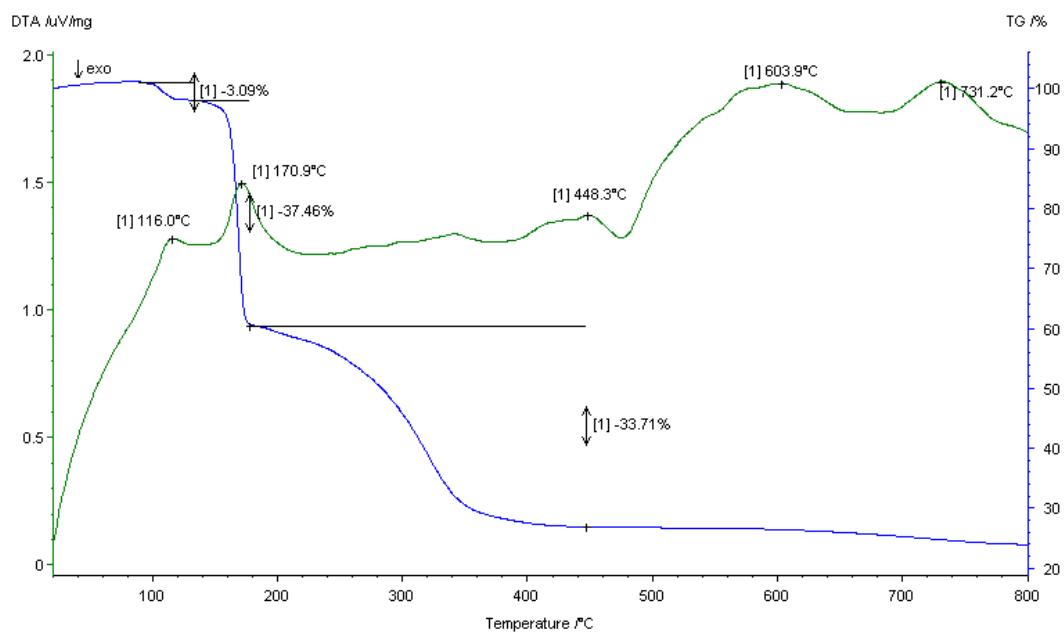

The TGA and DSC curves of **7**

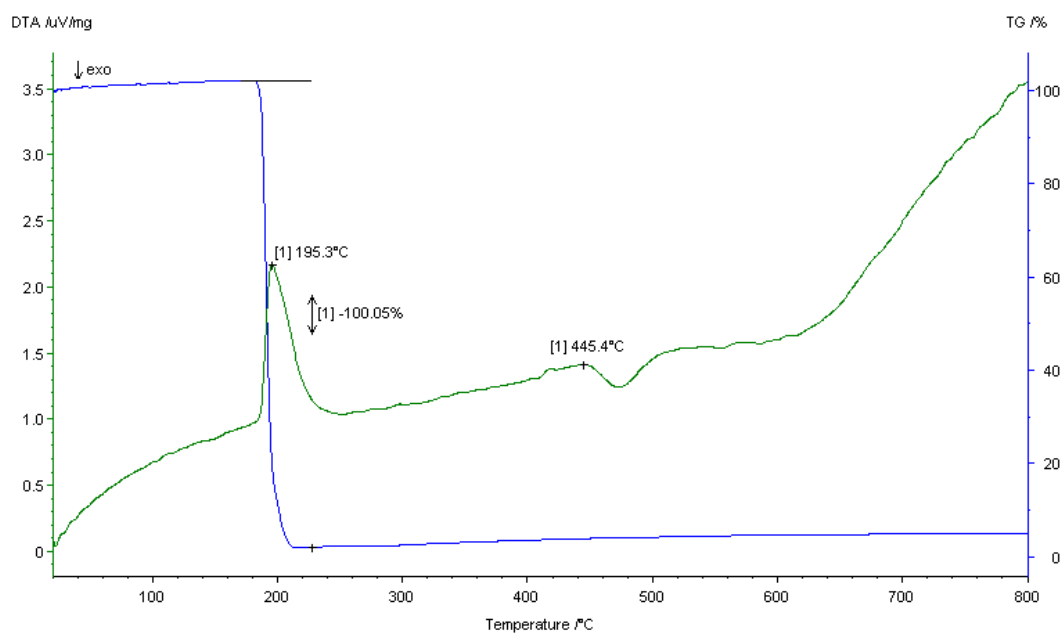

The TGA and DSC curves of **8**

## IR curves

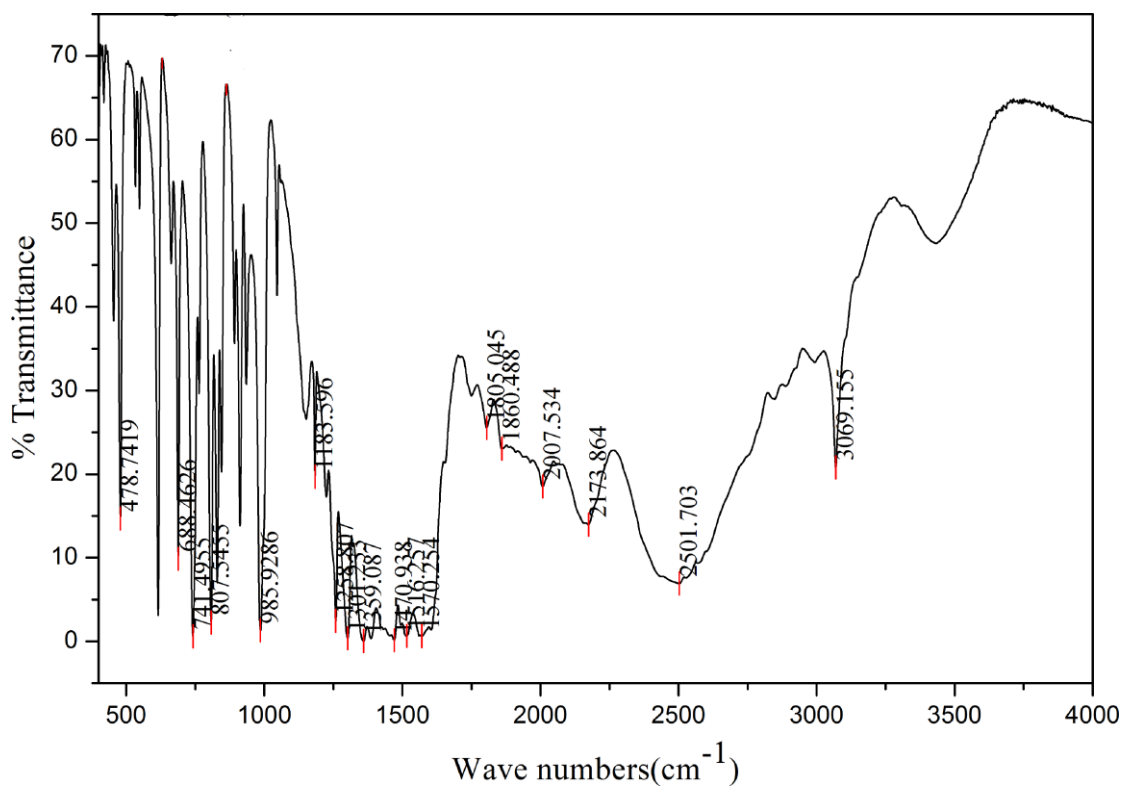

The IR curve of **1**

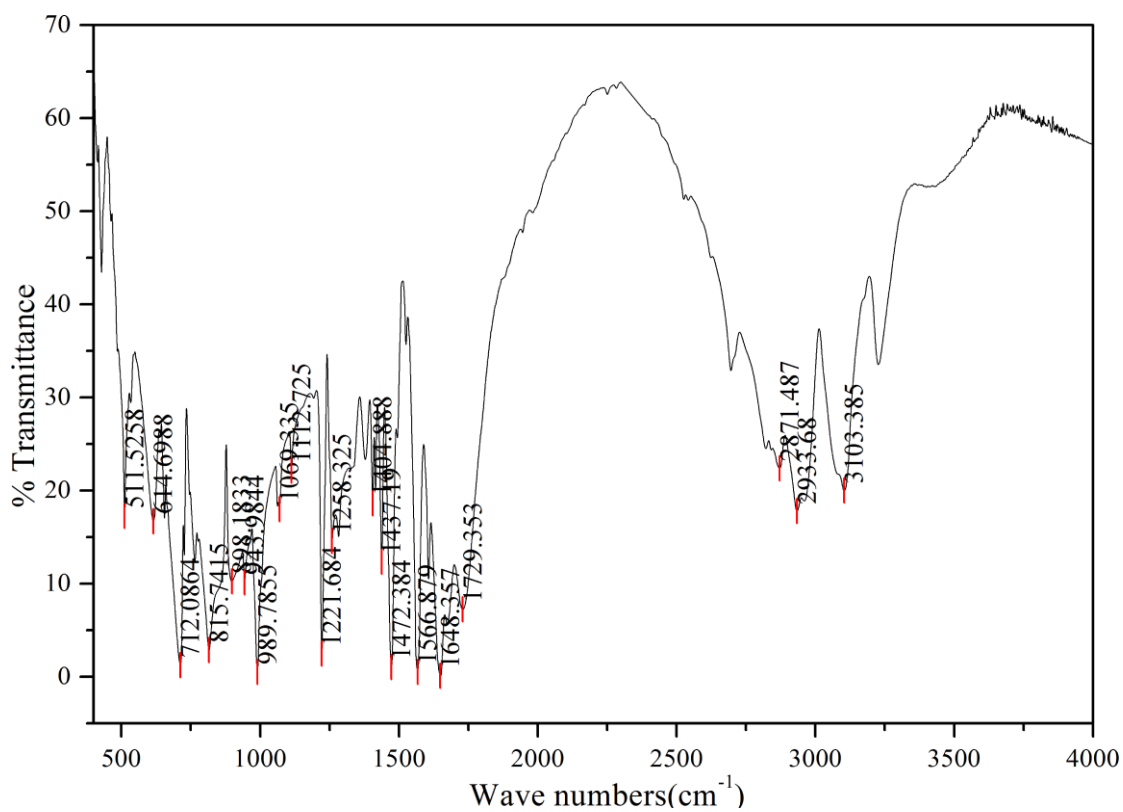

The IR curve of **2**

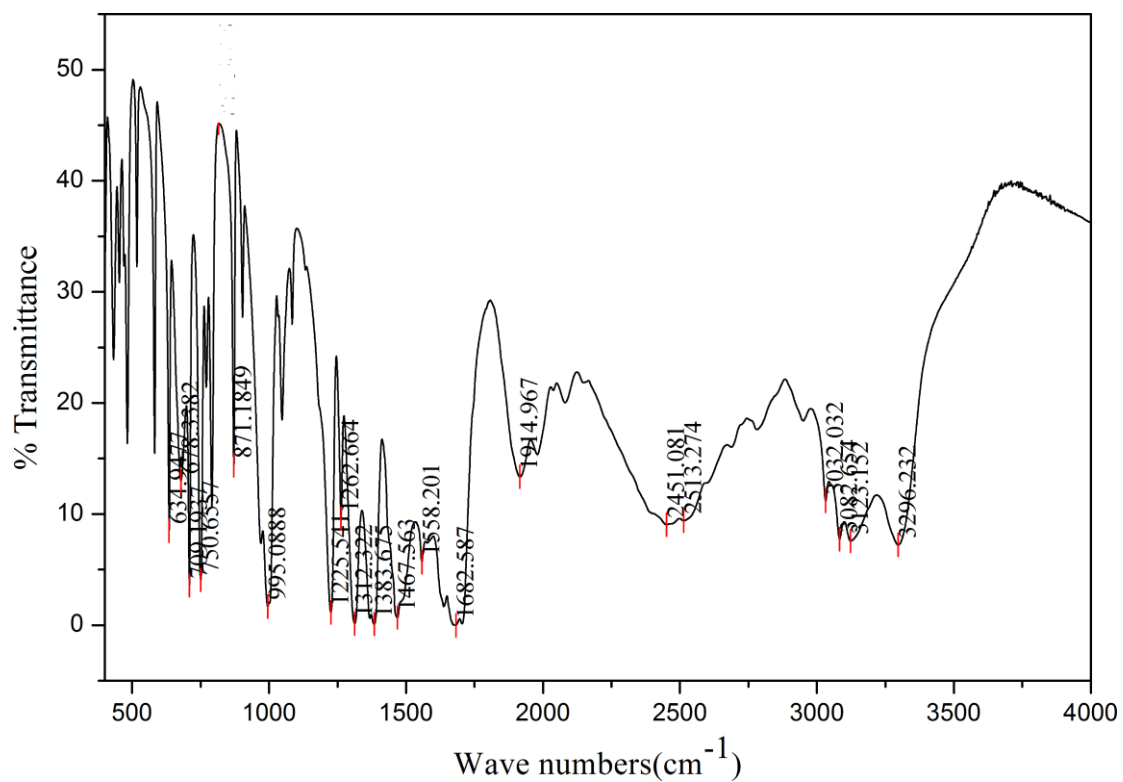

The IR curve of 3

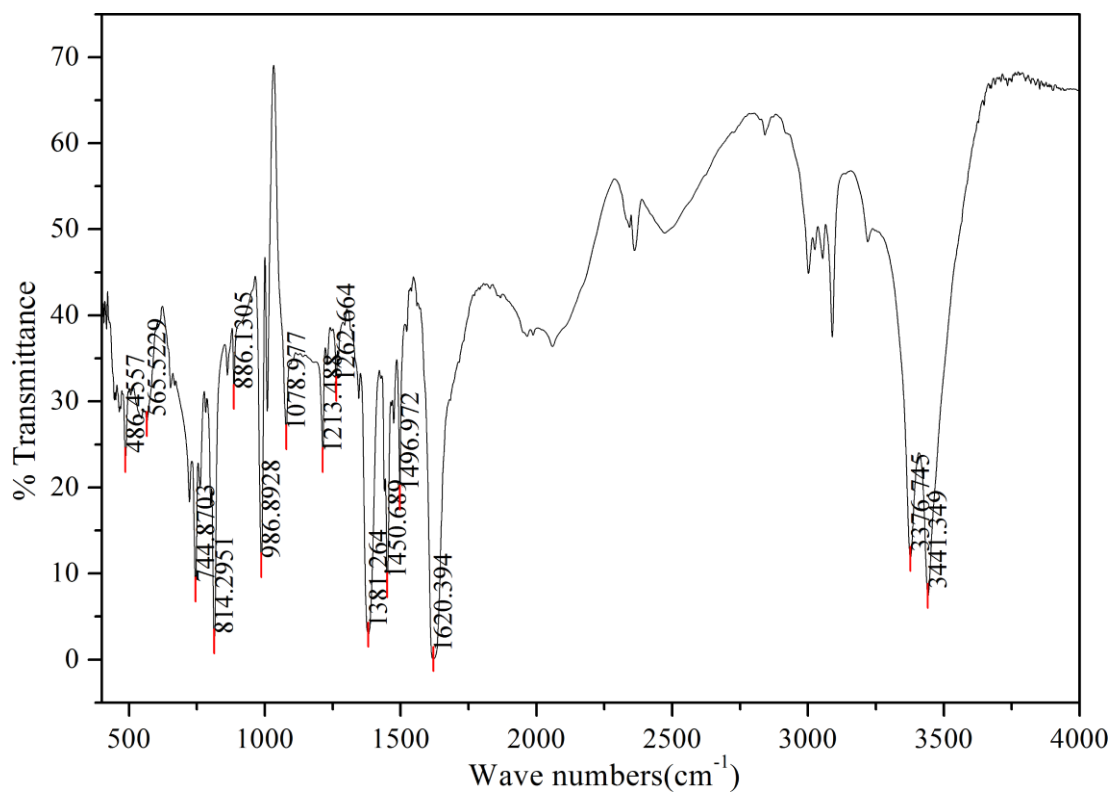

The IR curve of 4

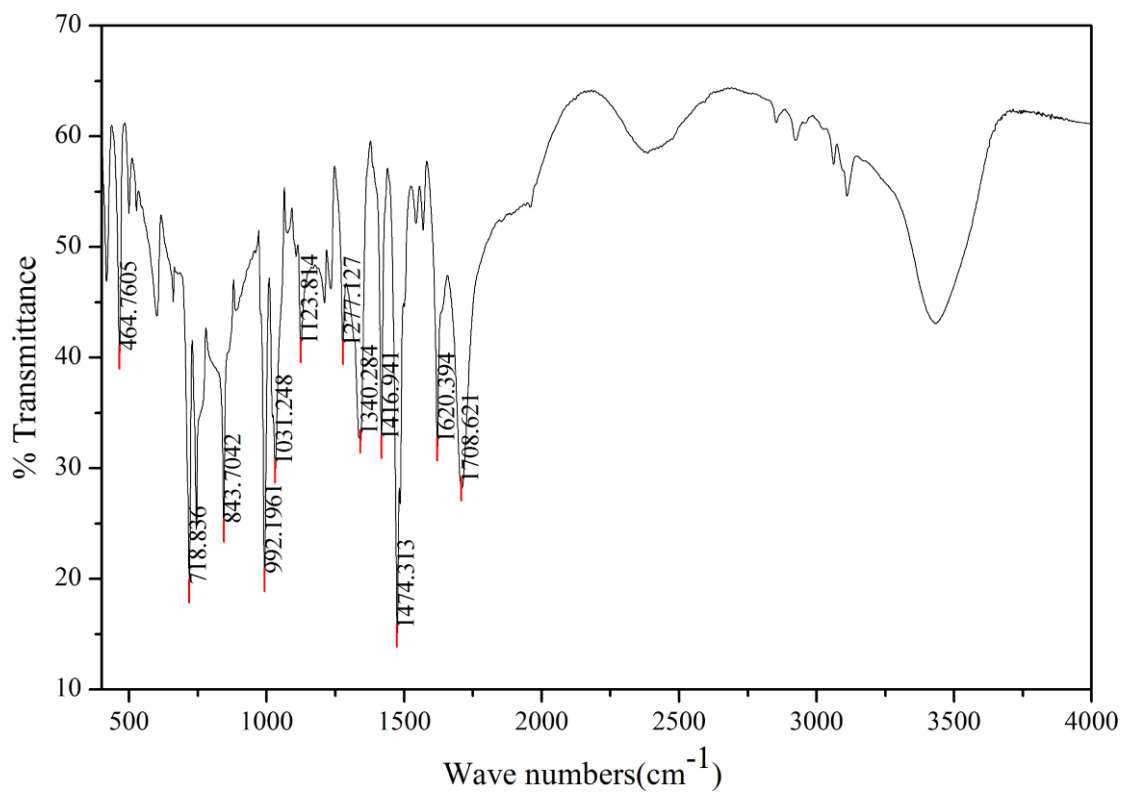

The IR curve of **5**

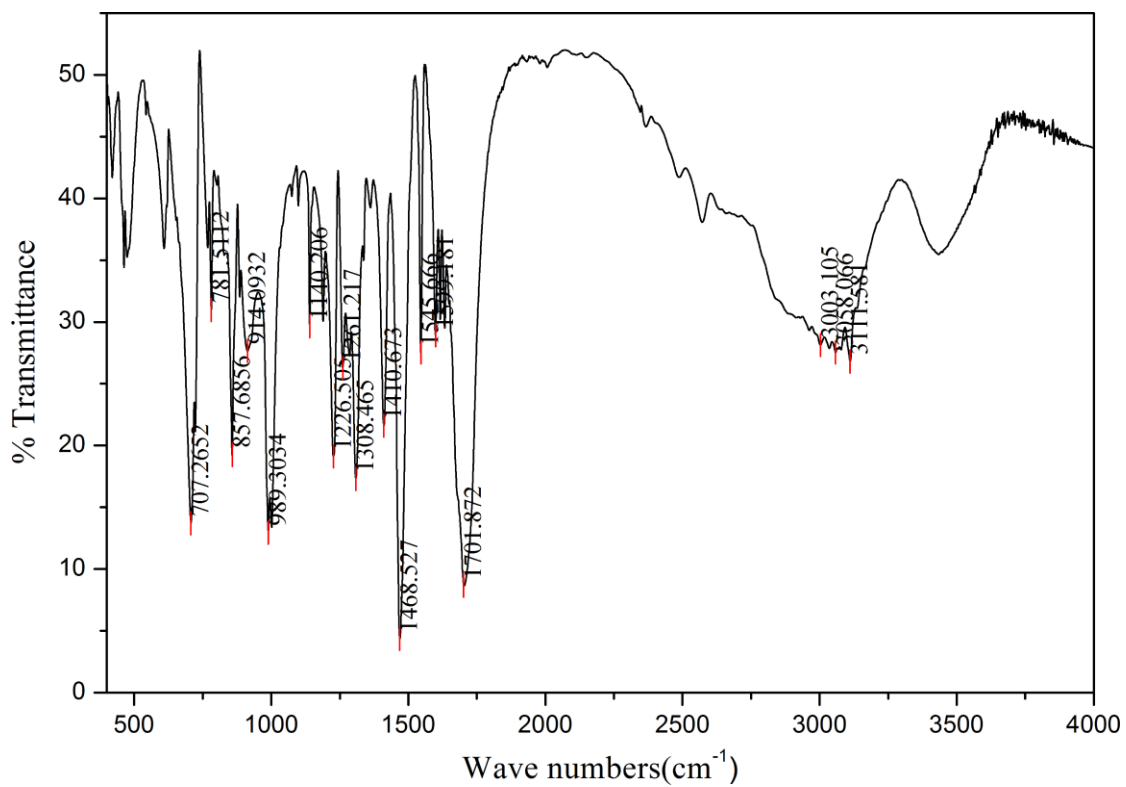

The IR curve of **6**

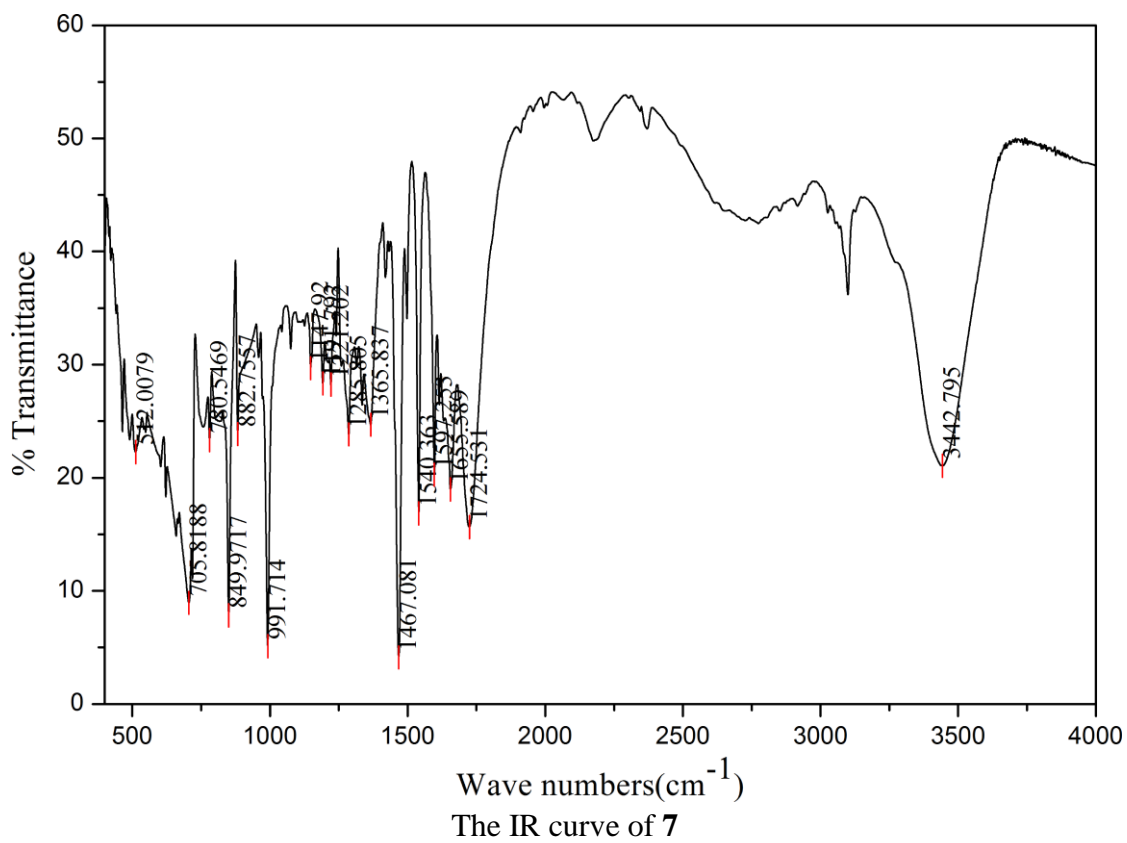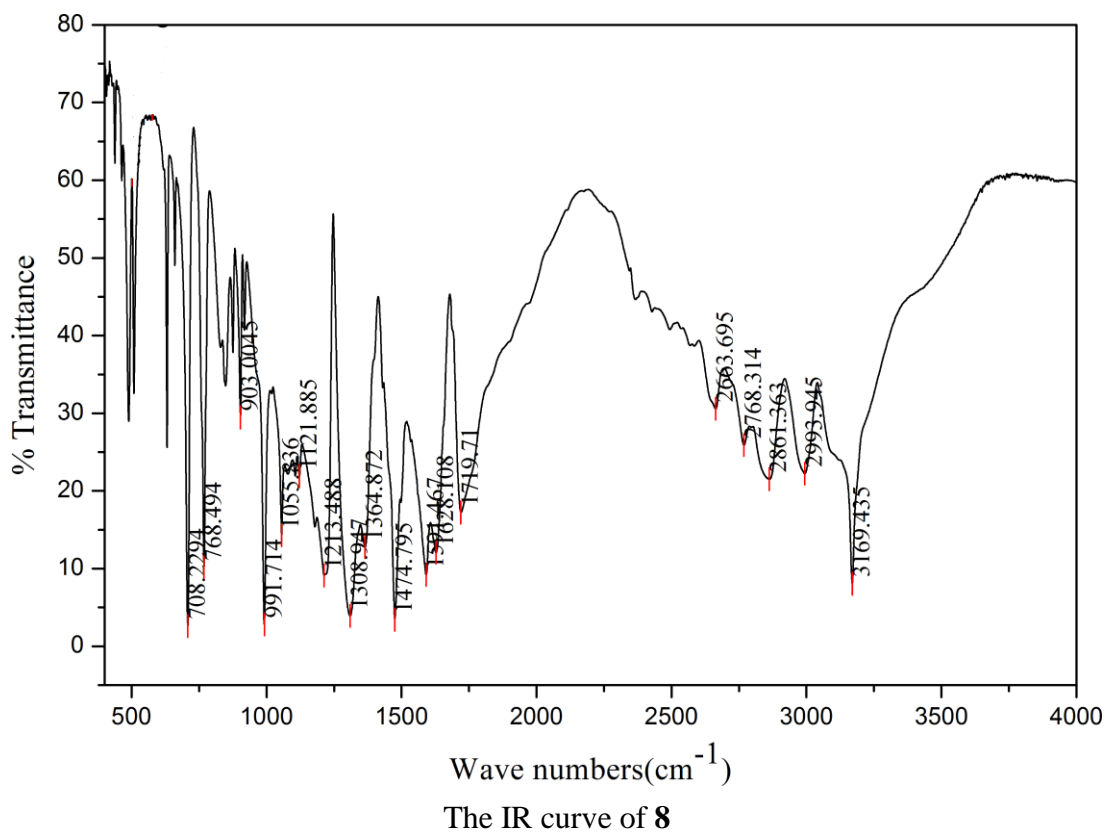



## XRD curves

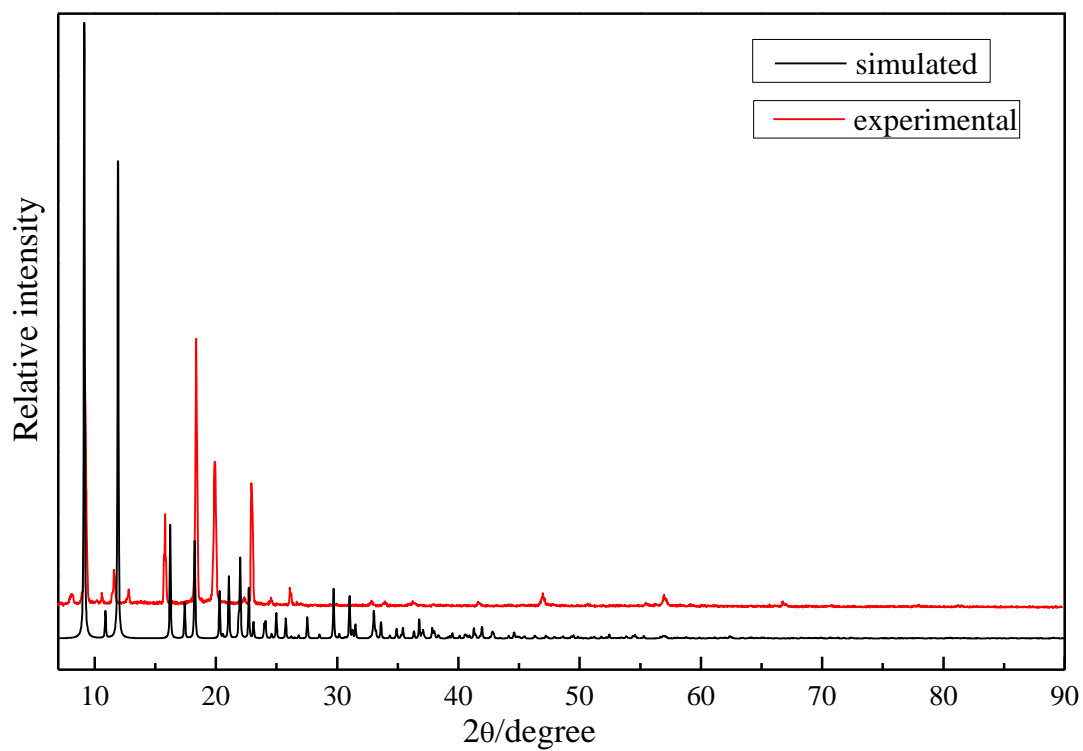

The XRD curve of **1**

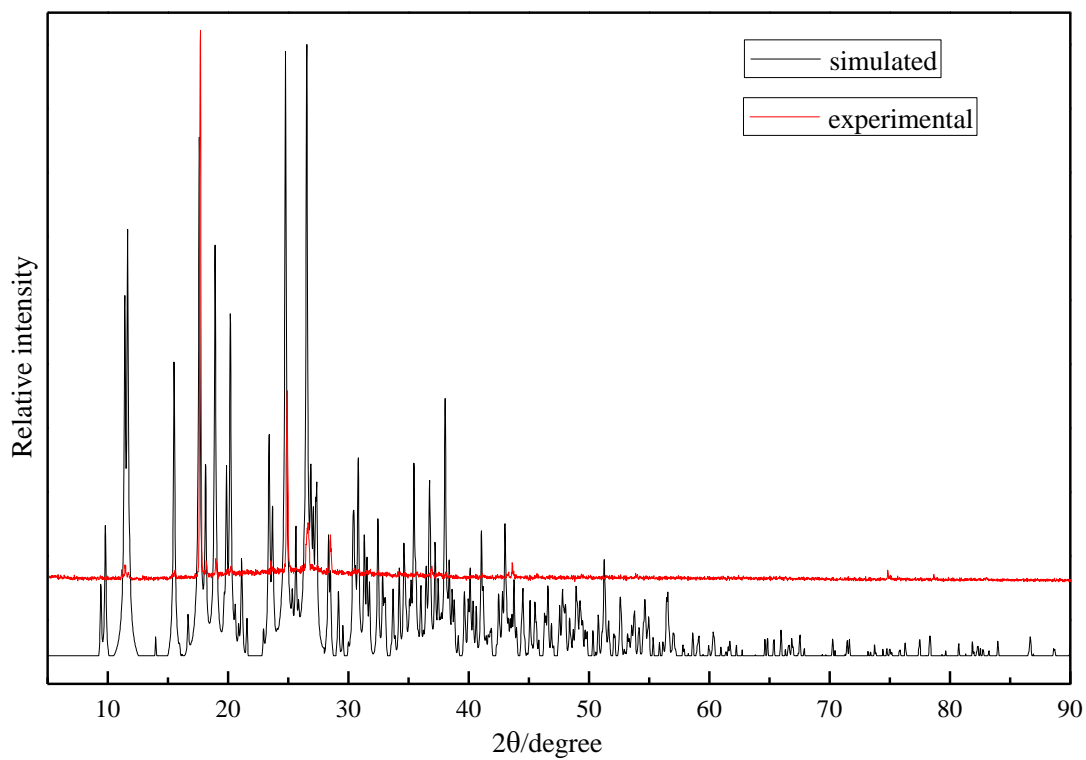

The XRD curve of **2**

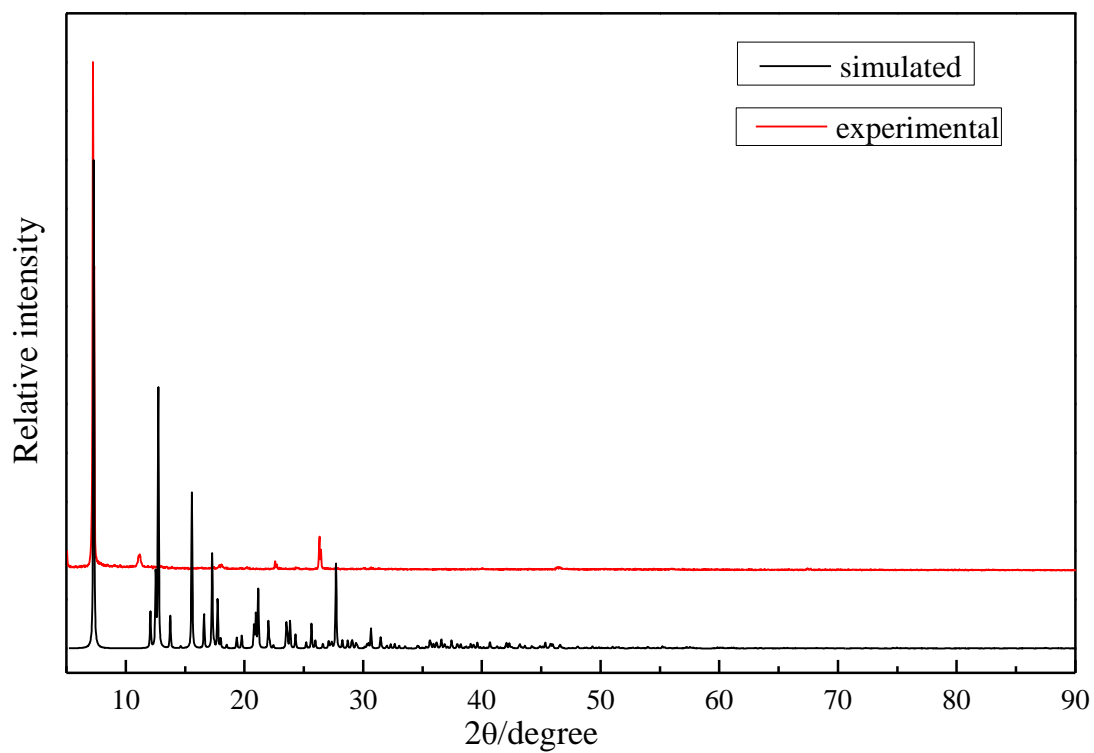

The XRD curve of **3**

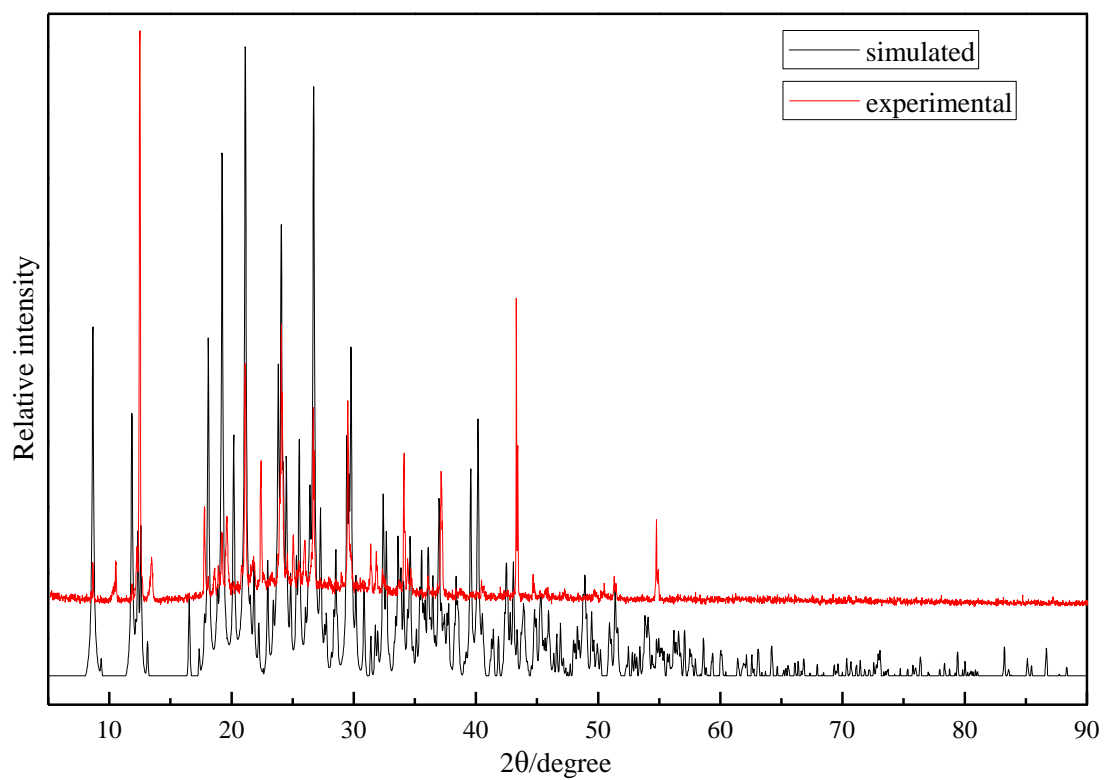

The XRD curve of **4**

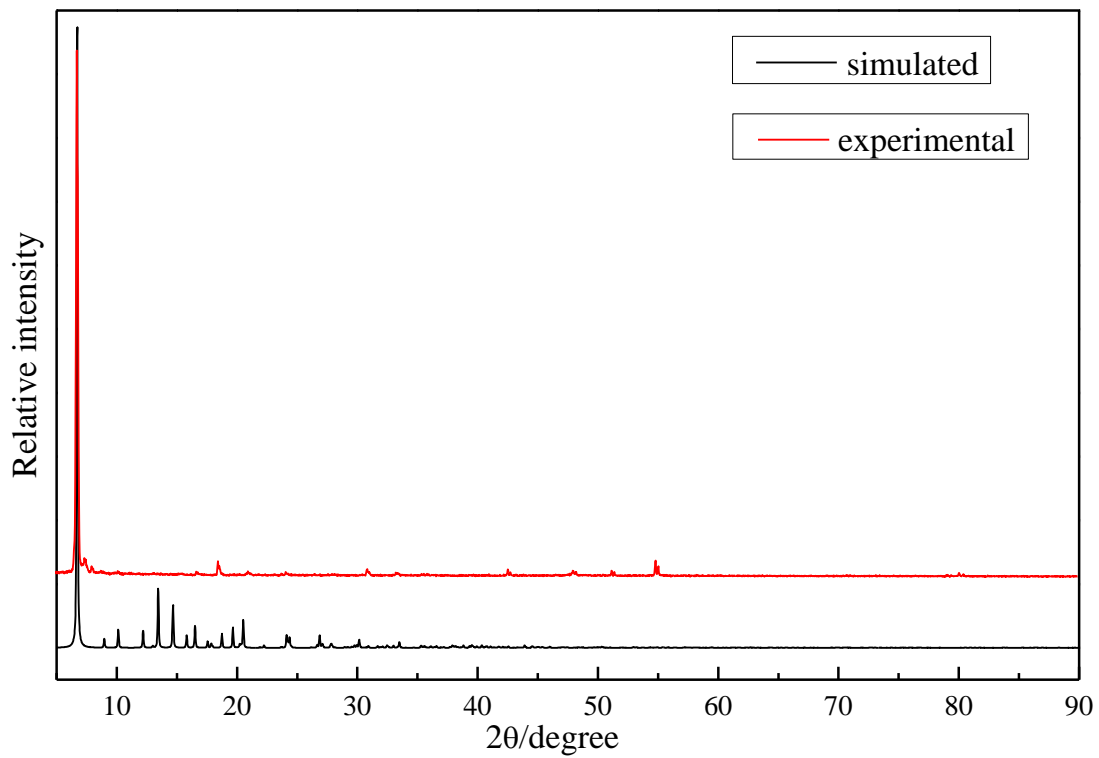

The XRD curve of **5**

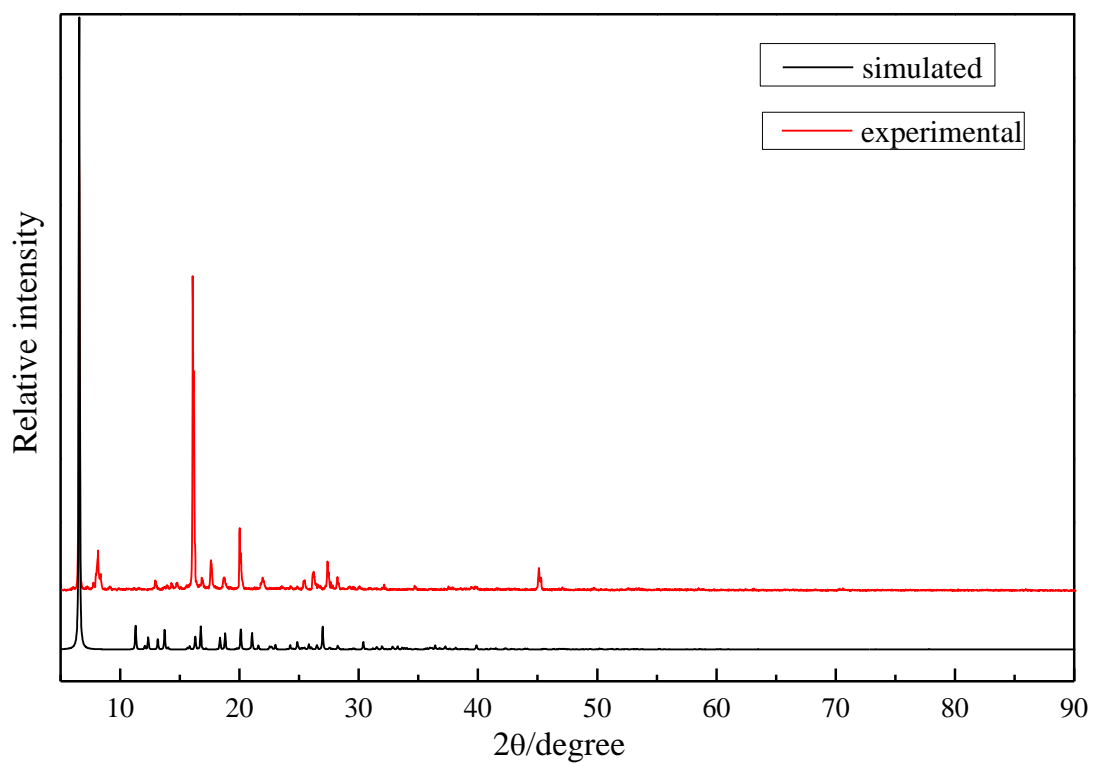

The XRD curve of **6**

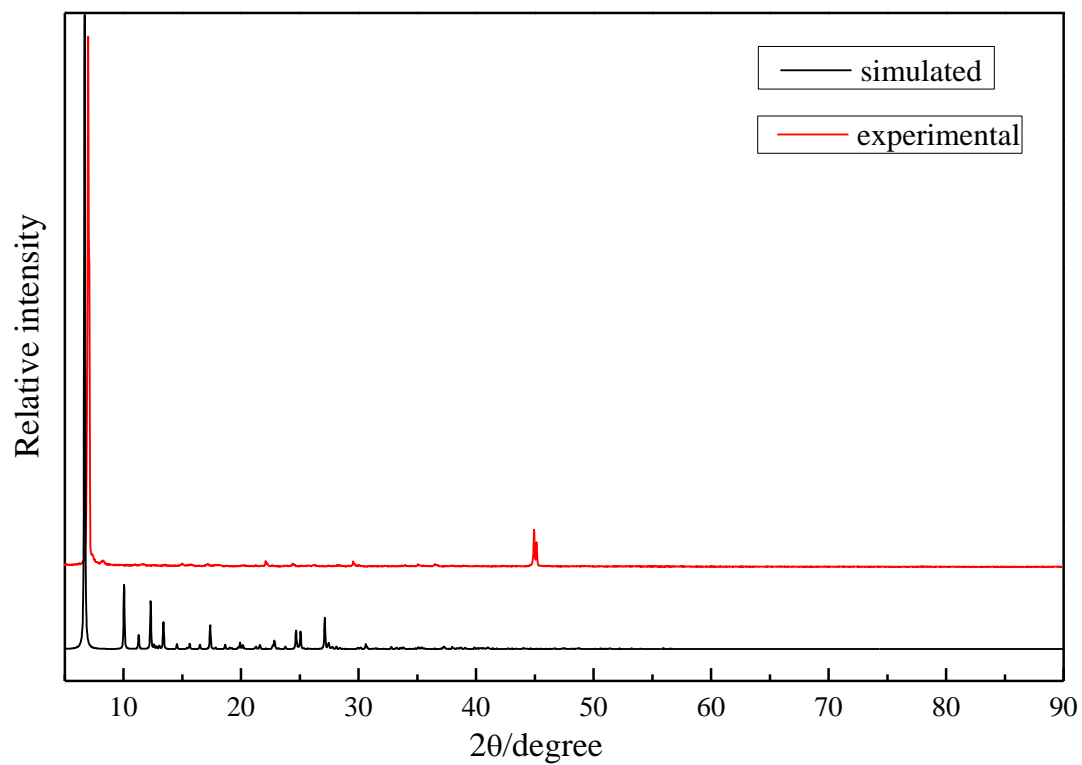

The XRD curve of **7**

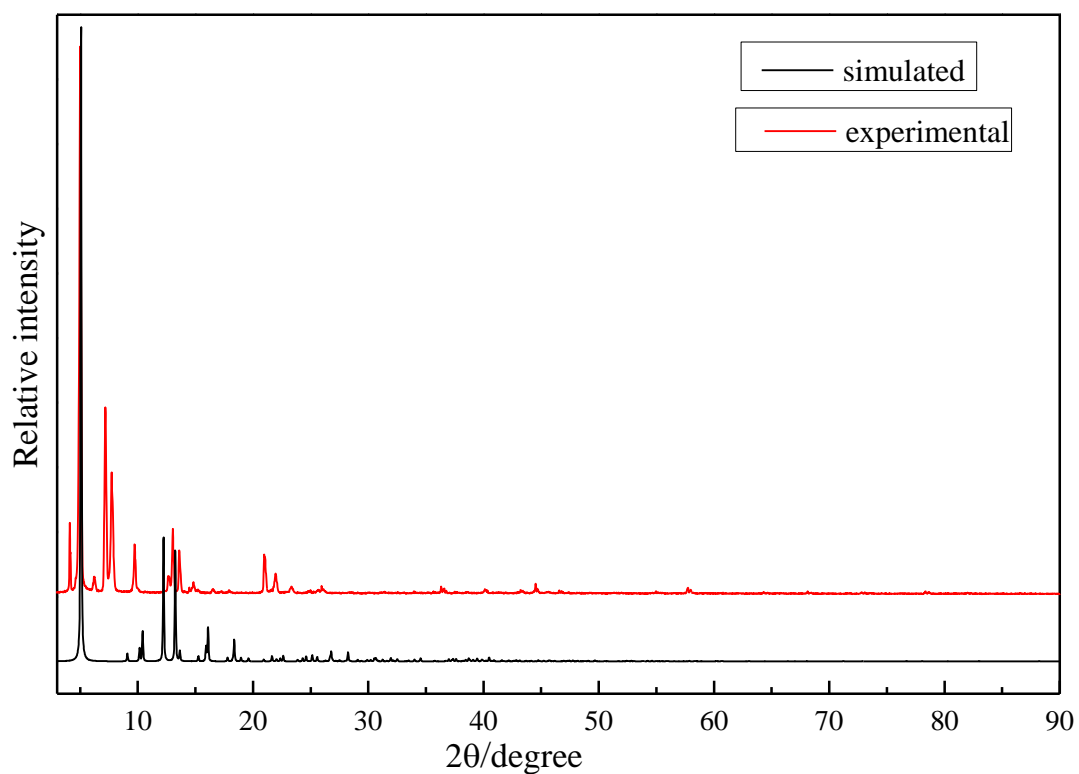

The XRD curve of **8**
